# Supplementary material for: Diffuse reflectance-based spectroscopic technique for real-time estimation of localized blood oxygenation parameters from human fingertips: a preliminary study
Source: Royal Society of Chemistry journal article supplement (doi:10.1039/d2sd00126h), 2022-01-01
Supplement: d2sd00126h1.pdf [file d2sd00126h1.pdf]

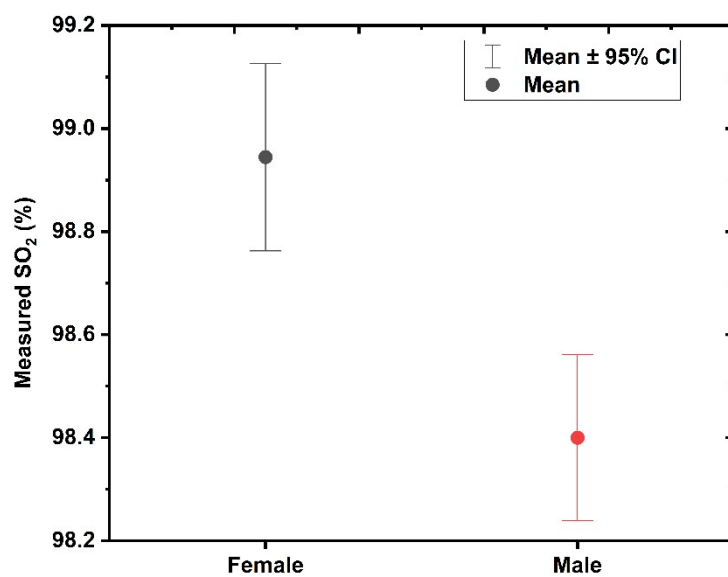

Fig. S1 The interval plot comprising the oxygen saturation (mean  $\pm$  95% CI) measured with the pulse oximeter from the fingertip of the female and male subjects, respectively.

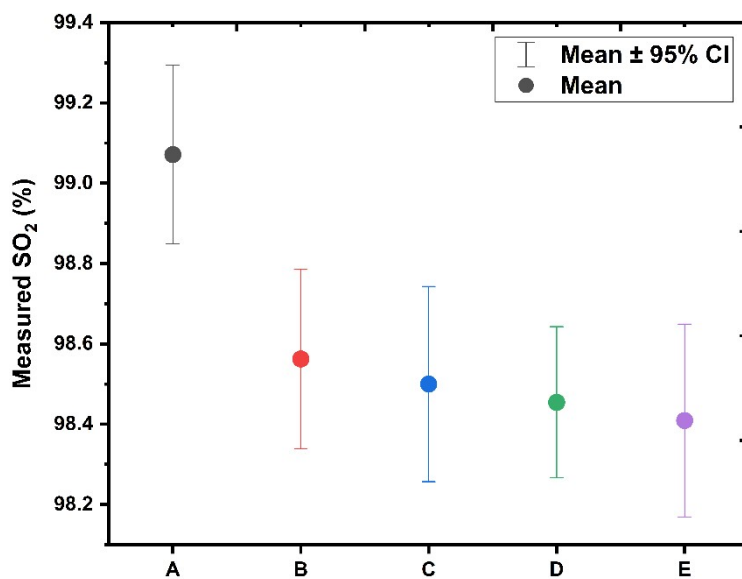

Fig. S2 The interval plot comprising the oxygen saturation (mean  $\pm$  95% CI) measured with the pulse oximeter from the fingertip of the different age groups.

**Table S1.** Dunn's multiple comparison post-hoc test statistics for age-wise study of  $\Delta$ RHb,  $\Delta$ HbO<sub>2</sub> and  $\Delta$ SO<sub>2</sub> (A=20-24 years, B= 25-29 years, C= 30-34 years, D= 35-39 years and E= above 40 years).

| Age-group Pairs | For $\Delta$ RHb |       |         |      | For $\Delta$ HbO <sub>2</sub> |      |         |      | For $\Delta$ SO <sub>2</sub> |       |         |      |
|-----------------|------------------|-------|---------|------|-------------------------------|------|---------|------|------------------------------|-------|---------|------|
|                 | Mean rank diff   | Z     | prob    | Sig* | Mean rank diff                | Z    | prob    | Sig* | Mean rank diff               | Z     | prob    | Sig* |
| AB              | -6.11            | -0.67 | 1.08E-8 | 1    | 2.20                          | 0.24 | 2.18E-7 | 1    | -2.58                        | -0.28 | 0.585   | 0    |
| AC              | -17.23           | -1.81 | 1.66E-7 | 1    | 21.88                         | 2.30 | 1.81E-8 | 1    | 24.27                        | 2.33  | 0.021   | 1    |
| AD              | -27.04           | -2.77 | 3.81E-6 | 1    | 25.86                         | 2.65 | 9.08E-6 | 1    | 25.28                        | 2.66  | 0.032   | 1    |
| AE              | -42.19           | -5.76 | 8.01E-8 | 1    | 42.04                         | 5.74 | 9.04E-8 | 1    | 41.18                        | 3.73  | 0.001   | 1    |
| BC              | -11.13           | -1.07 | 2.06E-4 | 1    | 19.67                         | 1.89 | 4.56E-6 | 1    | 26.85                        | 3.17  | 0.015   | 1    |
| BD              | -20.94           | -1.96 | 5.01E-4 | 1    | 23.65                         | 2.22 | 3.55E-9 | 1    | 27.86                        | 3.81  | 0.001   | 1    |
| BE              | -36.08           | -4.26 | 2.05E-4 | 1    | 39.83                         | 4.71 | 2.15E-5 | 1    | 43.47                        | 4.74  | 2.11E-5 | 1    |
| CD              | -9.81            | -0.88 | 3.63E-6 | 1    | 3.97                          | 0.36 | 0.003   | 1    | 1.01                         | 0.11  | 0.571   | 0    |
| CE              | -24.95           | -2.79 | 5.37E-7 | 1    | 20.15                         | 2.25 | 1.59E-5 | 1    | 16.91                        | 1.58  | 5.66E-7 | 1    |
| DE              | -15.14           | -1.64 | 7.50E-5 | 1    | 16.17                         | 1.75 | 3.48E-6 | 1    | 15.90                        | 1.63  | 3.02E-7 | 1    |

Sig\*: 1 indicates that the difference of the means is significant at the 0.05 level.

0 indicate that the difference of the means is NOT significant at the 0.05 level.
